# Supplementary material
Source: HighWire-hosted journal article supplement (http://www.jneurosci.org/highwire/filestream/598266/field_highwire_adjunct_files/1/Sup.table-rev..pdf)
Supplement: Sup.table-rev..pdf [file Sup.table-rev..pdf]

**Supplemental Table 1. Electrical membrane properties of hippocampal pyramidal neurons**

| Genotype                       | Membrane potential (mV) | AP threshold <sup>a</sup> (mV) | Input resistance (M $\Omega$ ) | AP amplitude (peak potential) (mV)     | AP duration (ms) |
|--------------------------------|-------------------------|--------------------------------|--------------------------------|----------------------------------------|------------------|
| WT neurons<br>( <i>n</i> = 33) | -58.3 $\pm$ 1.03        | -36.8 $\pm$ 1.02               | 37.8 $\pm$ 3.07                | 134.7 $\pm$ 3.16<br>(77.31 $\pm$ 2.39) | 3.5 $\pm$ 0.12   |
| Tg neurons<br>( <i>n</i> = 33) | -56.7 $\pm$ 1.20        | -34.9 $\pm$ 1.00               | 38.1 $\pm$ 3.52                | 134.0 $\pm$ 2.75<br>(76.48 $\pm$ 2.67) | 3.2 $\pm$ 0.16   |

Data are expressed as mean  $\pm$  SEM.

<sup>a</sup>Action potential (AP) threshold was measured as the starting potential of the spike in the neurons of wild-type (WT) and mutPOLG Tg (Tg) mice.
